# Supplementary material for: Red Blood Cell Transfusion Practices in PICU: To be liberal or not to be!
Source: Research Square preprint supplement (doi:10.21203/rs.3.rs-8090471/v1), 2025-11-18
Supplement: Supplementary file 1 [file 0261f956f3b8b8405a0c3c1d.docx]

Supplemental Digital Content

**Red Blood Cell Transfusion Practices in PICU: To be liberal or not to be!**

Izzet Turkalp Akbasli, Selman Kesici, Benan Bayrakci

**Corresponding author:** Dr. Izzet Turkalp Akbasli

Division of Pediatric Emergency, Department of Pediatrics, Faculty of Medicine, Hacettepe University, Ankara 06270, Turkey [iakbasli@hacettepe.edu.tr](mailto:iakbasli@hacettepe.edu.tr)

**Contents**

[**STROBE Statement 1**](#_2bnahobua888)

[**eTable 1 - Age-Specific Reference Ranges for Complete Blood Count (CBC) Parameters in Pediatric Patients 3**](#_bfzxkslaovxd)

[**eTable 2 - Age Group Categories Categorical Post-hoc Analysis with Other Categorical Variables 4**](#_3lb9m89pba6d)

[**eTable 3 - Malnutrition Group Categories Categorical Post-hoc Analysis with Admitting Categories 5**](#_psebtznxyaet)

[**eTable 4 - PRISM and PDR Values' Numerical Analysis and Descriptive Representation According to Patients' Categorical Variables 6**](#_4smxerc3ykgy)

[**eTable 5 - Subgroup Analysis of Age and Malnutrition Categories Using Univariate Logistic Regression 7**](#_qo6yublef31p)

[**eTable 6 - Comparative analysis of patient characteristics based on frequency of RBC transfusions in the pediatric intensive care unit 8**](#_afo70563wn4w)

[**eFigure 1 - Comparison of Hb levels distributions according to transfusion status during admission 9**](#_4fnicmdxyxjn)

#

# STROBE Statement

#

|  | Item No | Recommendation |
| --- | --- | --- |
| Title and abstract | 1 | (*a*) Indicate the study’s design with a commonly used term in the title or the abstract. Page 2 |
| (*b*) Provide in the abstract an informative and balanced summary of what was done and what was found Page 2 |
| Introduction | | |
| Background/rationale | 2 | Explain the scientific background and rationale for the investigation being reported Page 3 |
| Objectives | 3 | State specific objectives, including any prespecified hypotheses Page 3 |
| Methods | | |
| Study design | 4 | Present key elements of study design early in the paper Page 4 |
| Setting | 5 | Describe the setting, locations, and relevant dates, including periods of recruitment, exposure, follow-up, and data collection Page 4 |
| Participants | 6 | (*a*) *Cohort study*—Give the eligibility criteria, and the sources and methods of selection of participants. Describe methods of follow-up Page 4  *Case-control study*—Give the eligibility criteria, and the sources and methods of case ascertainment and control selection. Give the rationale for the choice of cases and controls  *Cross-sectional study*—Give the eligibility criteria, and the sources and methods of selection of participants |
| (*b*) *Cohort study*—For matched studies, give matching criteria and number of exposed and unexposed  *Case-control study*—For matched studies, give matching criteria and the number of controls per case |
| Variables | 7 | Clearly define all outcomes, exposures, predictors, potential confounders, and effect modifiers. Give diagnostic criteria, if applicable Pages 4-5 |
| Data sources/ measurement | 8* | For each variable of interest, give sources of data and details of methods of assessment (measurement). Describe comparability of assessment methods if there is more than one group. Pages 4-5 |
| Bias | 9 | Describe any efforts to address potential sources of bias. Page 5 |
| Study size | 10 | Explain how the study size was arrived at Page 5 |
| Quantitative variables | 11 | Explain how quantitative variables were handled in the analyses. If applicable, describe which groupings were chosen and why Page 5 |
| Statistical methods | 12 | (*a*) Describe all statistical methods, including those used to control for confounding Page 5 |
| (*b*) Describe any methods used to examine subgroups and interactions Page 5 |
| (*c*) Explain how missing data were addressed NA |
| (*d*) *Cohort study*—If applicable, explain how loss to follow-up was addressed Page 4-5  *Case-control study*—If applicable, explain how matching of cases and controls was addressed  *Cross-sectional study*—If applicable, describe analytical methods taking account of sampling strategy |
| (*e*) Describe any sensitivity analyses NA |

| Results | | |
| --- | --- | --- |
| Participants | 13* | (a) Report numbers of individuals at each stage of study—eg numbers potentially eligible, examined for eligibility, confirmed eligible, included in the study, completing follow-up, and analysed Pages 5-6 |
| (b) Give reasons for non-participation at each stage Page 6 |
| (c) Consider use of a flow diagram Figure 1 |
| Descriptive data | 14* | (a) Give characteristics of study participants (eg demographic, clinical, social) and information on exposures and potential confounders Pages 6, Table 1 |
| (b) Indicate number of participants with missing data for each variable of interest NA |
| (c) *Cohort study*—Summarise follow-up time (eg, average and total amount) |
| Outcome data | 15* | *Cohort study*—Report numbers of outcome events or summary measures over time Page 6 |
| *Case-control study—*Report numbers in each exposure category, or summary measures of exposure |
| *Cross-sectional study—*Report numbers of outcome events or summary measures |
| Main results | 16 | (*a*) Give unadjusted estimates and, if applicable, confounder-adjusted estimates and their precision (eg, 95% confidence interval). Make clear which confounders were adjusted for and why they were included Pages 7 |
| (*b*) Report category boundaries when continuous variables were categorized Pages 7 |
| (*c*) If relevant, consider translating estimates of relative risk into absolute risk for a meaningful time period NA |
| Other analyses | 17 | Report other analyses done—eg analyses of subgroups and interactions, and sensitivity analyses Page 8 |
| Discussion | | |
| Key results | 18 | Summarise key results with reference to study objectives Page 9 |
| Limitations | 19 | Discuss limitations of the study, taking into account sources of potential bias or imprecision. Discuss both direction and magnitude of any potential bias Page 12 |
| Interpretation | 20 | Give a cautious overall interpretation of results considering objectives, limitations, multiplicity of analyses, results from similar studies, and other relevant evidence Pages 10-12 |
| Generalisability | 21 | Discuss the generalisability (external validity) of the study results Page 12 |
| Other information | | |
| Funding | 22 | Give the source of funding and the role of the funders for the present study and, if applicable, for the original study on which the present article is based NA |

#

*Give information separately for cases and controls in case-control studies and, if applicable, for exposed and unexposed groups in cohort and cross-sectional studies.

Note: An Explanation and Elaboration article discusses each checklist item and gives methodological background and published examples of transparent reporting. The STROBE checklist is best used in conjunction with this article (freely available on the Web sites of PLoS Medicine at http://www.plosmedicine.org/, Annals of Internal Medicine at http://www.annals.org/, and Epidemiology at http://www.epidem.com/). Information on the STROBE Initiative is available at www.strobe-statem

# eTable 1 - Age-Specific Reference Ranges for Complete Blood Count (CBC) Parameters in Pediatric Patients

| **Age Specific CBC Parameters** | **Hemoglobin (g/dL)** | | **Hematocrit (%)** | | **MCV (µM 3)** | |
| --- | --- | --- | --- | --- | --- | --- |
| **Mean** | **Lower limit** | **Mean** | **Lower limit** | **Mean** | **Lower limit** |
| Gestational age 26-30 w | 13.4 | 11.0 | 41.5 | 34.9 | 118.2 | 106.7 |
| Gestational age 28 w | 14.5 | NA | 45 | NA | 120 | NA |
| Gestational age 32 w | 15.0 | NA | 47 | NA | 118 | NA |
| Term newborn | 16.5 | 13.5 | 51 | 42 | 108 | 98 |
| Day 1 – 3 | 18.5 | 14.5 | 56 | 45 | 108 | 95 |
| 2 week | 16.6 | 13.4 | 53 | 41 | 105 | 88 |
| 1 month | 13.9 | 10.7 | 44 | 33 | 101 | 91 |
| 2 month | 11.2 | 9.4 | 35 | 28 | 95 | 84 |
| 6 month | 12.6 | 11.1 | 36 | 31 | 76 | 68 |
| 6-24 month | 12.5 | 11.0 | 37 | 33 | 77 | 70 |
| 2-4 yo | 12.5 | 11.0 | 38 | 34 | 79 | 73 |
| 5-7 yo | 13.0 | 11.5 | 39 | 35 | 81 | 75 |
| 8-11 yo | 13.5 | 12.0 | 40 | 36 | 83 | 76 |
| 12-14 yo female | 13.5 | 12.0 | 41 | 36 | 85 | 78 |
| 12-14 yo female | 14.0 | 12.5 | 43 | 37 | 84 | 77 |
| 15-18 yo female | 14.0 | 12.0 | 41 | 36 | 87 | 79 |
| 15-18 yo male | 15.0 | 13.0 | 46 | 38 | 86 | 78 |

# eTable 2 - Age Group Categories Categorical Post-hoc Analysis with Other Categorical Variables

| **Age Group and Categorical Variables: Post-hoc OR (Z) Analysis** | **Age Group 0-2,**  **n, OR, (Z)** | **Age Group 2-6,**  **n, OR, (Z)** | **Age Group 6-12,**  **n, OR, (Z)** | **Age Group >12,**  **n, OR, (Z)** |
| --- | --- | --- | --- | --- |
|
| **Admitting categories** |  |  |  |  |
| **Postoperative Monitoring** | 160, 1.37, (2.82)***a*** | 125, 0.89, (-1.03) | 107, 1.16, (1.14) | 123, 0.72, (-2.75)***a*** |
| **Renal Failure** | 5, 0.66, (-0.82) | 11, 2.11, (1.87) | 6, 1.28, (0.52) | 4, 0.45, (-1.46) |
| **Unclassifiable group** | 21, 0.27, (-5.52) | 37, 0.56, (-3.1)***a*** | 70, 2.26, (5.17)***a*** | 88, 1.84, (4.13)***a*** |
| **Circulatory insufficiency** | 64, 1.27, (1.49) | 35, 0.54, (-3.17)***a*** | 37, 0.9, (-0.53) | 73, 1.39, (2.13)***a*** |
| **Hematology and Oncology** | 1, 0.13, (-1.98)***a*** | 7, 1.33, (0.63) | 7, 2.0, (1.5) | 7, 1.17, (0.33) |
| **Bleeding and Anemia** | 11, 1.63, (1.28) | 9, 1.22, (0.5) | 6, 1.06, (0.13) | 4, 0.38, (-1.8) |
| **CNS Dysfunction** | 39, 1.06, (0.32) | 38, 1.04, (0.22) | 39, 1.67, (2.61)***a*** | 26, 0.54, (-2.78)***a*** |
| **Septic Shock** | 25, 2.05, (2.69)***a*** | 16, 1.04, (0.12) | 7, 0.55, (-1.46) | 12, 0.62, (-1.49)***a*** |
| **Respiratory Failure** | **165, 3.64, (10.32)** | 92, 1.13, (0.9) | 31, 0.39, (-4.73)***a*** | **41, 0.31, (-6.77)** |
| **Trauma** | 24, 0.32, (-5.04)***a*** | 76, 1.68, (3.39)***a*** | 62, 1.88, (3.89)***a*** | 51, 0.76, (-1.59) |
| **Intoxication** | **15, 0.15, (-6.9)** | 77, 1.31, (1.81) | 12, 0.19, (-5.55)***a*** | **147, 4.39, (10.6)** |
| **Anemia** |  |  |  |  |
| **No anemia at admission** | **53, 0.49, (-6.85)** | 29, 1.07, (0.65) | 10, 1.14, (1.15) | **8, 1.67, (5.08)** |
| **Anemia at admission** | **204, 2.03, (6.85)** | 130, 0.94, (-0.65) | 64, 0.88, (-1.15) | **62, 0.6, (-5.08)** |
| **Admitting type** |  |  |  |  |
| **Surgical Departments** | **167, 1.7, (4.69)*a*** | 107, 0.76, (-2.2)***a*** | 97, 1.09, (0.65) | 112, 0.69, (-3.02)***a*** |
| **Pediatrics Departments** | 96, 1.33, (2.09)***a*** | 82, 1.04, (0.28) | 53, 0.86, (-0.91) | 77, 0.81, (-1.52) |
| **Pediatric Emergency Room** | **267, 0.56, (-5.64)*a*** | 334, 1.2, (1.72) | 234, 1.01, (0.1) | **387, 1.48, (3.76)*a*** |
| **Malnutrition categories** |  |  |  |  |
| **Severely underweight** | **95, 2.08, (5.09)** | 36, 0.48, (-3.93)***a*** | 43, 0.94, (-0.36) | 62, 0.88, (-0.85) |
| **Underweight** | **92, 2.45, (5.99)** | 44, 0.74, (-1.71) | 30, 0.69, (-1.83) | 43, 0.62, (-2.7)***a*** |
| **Normal** | 286, 0.62, (-4.71)***a*** | 349, 1.28, (2.32)***a*** | 246, 1.09, (0.71) | 377, 1.2, (1.73) |
| **At risk of overweight** | 38, 0.58, (-2.87)***a*** | 55, 1.0, (0.03) | 40, 0.99, (-0.05) | 78, 1.54, (2.82)***a*** |
| **Overweight** | 9, 0.38, (-2.72)***a*** | 26, 1.57, (1.82) | 23, 1.97, (2.63)***a*** | 16, 0.68, (-1.35) |
| **Obese** | 10, 1.88, (1.54) | 13, 3.14, (2.83)***a*** | 2, 0.37, (-1.36) | - |

In this study, subsequent to the application of the Chi-Square test for assessing multiple categorical variables among groups, a specific type of post-hoc analysis employing the ransacking method was conducted. This methodology entails the comparison of the computed Chi-Square critical values, which are adjusted based on the alpha significance level, against the respective z-values determined by the degree of freedom (dof). For pairwise 2x2 tables (dof = 1), tests yielding values greater than ±1.96 were deemed significant, and such findings are denoted with an asterisk ‘*a*’ in the corresponding cells. Furthermore, adjusted z-values are considered significant for the Admitting categories group (dof=40) if they exceed ±6.62, for the Anemi status at admission (dof=4) if they exceed ±2.8, for the Admitting type group (dof=6) if they exceed ±3.55, and for the z group (dof=15) if they exceed ±5.0, with these significant z-scores being highlighted in bold within the table.

##

# eTable 3 - Malnutrition Group Categories Categorical Post-hoc Analysis with Admitting Categories

| **Admission Categories by Malnutrition Status: Post-hoc OR (Z) Analysis** | **Severely underweight** | **Underweight** | **Normal** | **At risk of overweight** | **Overweight** | **Obese** |
| --- | --- | --- | --- | --- | --- | --- |
| **Postoperative Monitoring** | 103, 2.57, (6.6)***a*** | 70, 1.54, (2.75)***a*** | 292, 0.72, (-3.14)***a*** | 31, 0.47, (-3.76)***a*** | 12, 0.55, (-1.86) | 7, 1.13, (0.28) |
| **Renal Failure** | 3, 0.98, (-0.03) | 5, 2.08, (1.46) | 14, 0.7, (-0.91) | 2, 0.71, (-0.47) | 1, 1.05, (0.05) | 1, 3.27, (1.14) |
| **Unclassifiable group** | 11, 0.37, (-3.09)***a*** | 17, 0.71, (-1.28) | 150, 1.41, (2.22)***a*** | 31, 1.51, (1.95) | 7, 0.86, (-0.36) | - |
| **Circulatory insufficiency** | 25, 1.03, (0.11) | 21, 0.96, (-0.17) | 135, 1.11, (0.66) | 20, 0.89, (-0.45) | 7, 0.9, (-0.27) | 1, 0.36, (-1.01) |
| **Hematology and Oncology** | 1, 0.36, (-1.01) | 1, 0.41, (-0.87) | 19, 3.84, (2.16)***a*** | - | 1, 1.25, (0.22) | - |
| **Bleeding and Anemia** | 1, 0.26, (-1.33) | 8, 3.22, (2.79)***a*** | 17, 0.78, (-0.66) | 3, 0.95, (-0.09) | 1, 0.9, (-0.1) | - |
| **CNS Dysfunction** | 8, 0.43, (-2.28)***a*** | 12, 0.78, (-0.78) | 94, 1.19, (0.94) | 20, 1.44, (1.45) | 6, 1.17, (0.36) | 2, 1.15, (0.19) |
| **Septic Shock** | 7, 0.99, (-0.01) | 11, 1.99, (2.01) | 37, 0.96, (-0.13) | 3, 0.44, (-1.37) | 2, 0.9, (-0.14) | - |
| **Respiratory Failure** | 72, 2.6, (6.09)***a*** | 53, 1.88, (3.67)***a*** | 168, 0.57, (-4.6)***a*** | 18, 0.45, (-3.17)***a*** | 9, 0.7, (-0.99) | 9, 2.93, (2.55) |
| **Trauma** | 2, 0.06, (-3.86)***a*** | 7, 0.27, (-3.36)***a*** | 146, 1.35, (1.92) | 38, 2.04, (3.64)***a*** | 15, 2.24, (2.69) | 5, 2.14, (1.5) |
| **Intoxication** | 3, 0.08, (-4.33)***a*** | 4, 0.12, (-4.11)***a*** | 186, 1.84, (4.01)***a*** | 45, 2.1, (4.04)***a*** | 13, 1.52, (1.34) | - |
| **Anemia at admission** |  |  |  |  |  |  |
| **No anemia** | **16, 0.61, (-3.5)** | 17, 0.65, (-3)***a*** | 57, 1.3, (2.8)***a*** | 3, 1.46, (2.56)***a*** | 6, 1.2, (0.78) | 1, 0.35, (-2.3)***a*** |
| **Anemia** | **84, 1.64, (3.5)** | 67, 1.55, (2.9)***a*** | 244, 0.7, (-2.8)***a*** | 34, 0.7, (-2.5)***a*** | 17, 0.8, (-0.78) | 14, 2.86, (2.3)***a*** |

In the post hoc analysis of malnutrition subgroups and admitting categories, significance was noted in pairwise results, indicated by z values of ±1.96 for a degree of freedom (dof) of 1, and these findings are marked with an asterisk '*' in the relevant table cells. However, the adjusted categorical post hoc analysis, employing the ransacking method on the chi-square test, did not yield statistically significant results for a dof of 50, as reflected by a z value of ±8.22 and for the Anemi status at admission (dof=6) if they exceed ±

# eTable 4 - PRISM and PDR Values' Numerical Analysis and Descriptive Representation According to Patients' Categorical Variables

| **PRISM-III and Pediatric Death Rate Scores by Categorical Patient Characteristics and Transfusion Status** | **PRISM-III Score** | | **Pediatric Death Rate Score** | |
| --- | --- | --- | --- | --- |
| **Transfused** | **Not Transfused** | **Transfused** | **Not Transfused** |
| **Gender** |  |  |  |  |
| **Male Sex** | 6.6, [1.3 – 25.9] | 1.5, [0.7 – 6.0] | 4.1, [1.1 – 18.4] | 1.0, [0.7 – 3.6] |
| **Female Sex** | 5.5, [2 – 21.5] | 1.5, [0.7 – 5.5] | 3.3, [1.0 – 19.7] | 0.9, [0.6 – 3.2] |
| **Age Group** |  |  |  |  |
| **0–2 years** | 12.0, [4.7 – 20.0] | 5.0, [0.0 – 11.0] | 5.1, [1.8 – 25.6] | 1.9, [0.8 – 5.0] |
| **2–6 years** | 14.0, [5.0 – 22.5] | 2.2, [0.0 – 9.0] | 4.2, [1.4 – 16.8] | 1.4, [0.7 – 3.6] |
| **6–12 years** | 9.0, [0.8 – 19.2] | 4.0, [0.0 – 11.0] | 1.9, [0.8 – 72] | 1.1, [0.6 – 5.0] |
| **> 12 years** | 2.0, [0.0 – 18.0]ᵃ | 3.0, [0.0 – 11.0] | 1.1, [0.4 – 5.9] | 0.7, [0.4 – 1.9] |
| **Malnutrition Groups** |  |  |  |  |
| Severely underweight | 14.0, [5.7 – 21.0] | 2.0, [0.0 – 10.0] | 5.1, [1.2 – 22.1] | 0.9, [0.6 – 3.2] |
| Underweight | 11.0, [6.0 – 22.0] | 5.0, [0.0 – 12.0] | 5.9, [1.6 – 26.5] | 1.75, [0.8 – 4.0] |
| Normal | 10.0, [1.0 – 19.3] | 4.0, [0.0 – 11.0] | 2.8, [0.8 – 17.8] | 1.0, [0.6 – 3.2] |
| Risk of overweight | 0.9, [0.15 – 10.0]ᵃ | 3.2, [0.0 – 11.0] | 1.9, [0.8 – 9.8] | 0.8, [0.5 – 3.9] |
| Overweight | 25.4, [12.7 – 42.3] | 4.0, [0.0 – 10.0] | 6.8, [1.8 – 22.5] | 0.8, [0.43 – 2.2] |
| Obese | 16.0, [6.5 – 22.0]ᵃ | 6.0, [5.0 – 29.0] | 7.0, [2.9 – 34.3]ᵃ | 1.5, [0.85 – 2.4] |
| **Admitting Type** |  |  |  |  |
| Pediatric Emergency Room | 12.0, [1.8 – 26.4] | 4.0, [0.0 – 10.0] | 4.6, [1.5 – 23] | 1.0, [0.6 – 3.6] |
| Surgical Departments | 5.0, [0.0 – 12.0]ᵃ | 1.0, [0.0 – 9.0] | 1.7, [0.8 – 5.9] | 0.8, [0.6 – 1.9] |
| Pediatric Departments | 18.0, [11.0 – 24.0] | 8.0, [0.0 – 14.0] | 5.9, [1.9 – 25.8] | 1.8, [0.7 – 8.3] |
| **Admitting Categories** |  |  |  |  |
| Postoperative Monitoring | 5.0, [0.0 – 13.0] | 1.0, [0.0 – 9.0] | 1.7, [0.8 – 5.5] | 0.8, [0.55 – 1.8] |
| Respiratory Failure | 17.0, [8.0 – 24.0] | 5.0, [2.0 – 13.3] | 13.0, [3.4 – 36.2] | 2.2, [0.8 – 5.9] |
| Intoxication | 26.0, [26.0 – 26.0] | 0.0, [0.0 – 5.25] | 63.3, [63.3 – 63.3] | 0.7, [0.3 – 0.8] |
| Trauma | 12.0, [0.7 – 35.2] | 2.05, [0.7 – 7.6] | 3.9, [1.08 – 12.3] | 1.2, [0.6 – 6.0] |
| Circulatory insufficiency | 13.0, [10.0 – 18.0] | 4.0, [0.45 – 11.0] | 9.1, [2.3 – 44.3] | 1.15, [0.7 – 2.7] |
| Central Nervous System Dysfunction | 15.0, [12.0 – 22.0] | 5.0, [0.0 – 10.3] | 4.2, [2.3 – 23.3] | 1.2, [0.6 – 2.7] |
| Septic Shock | 15.5, [6.3 – 21.3]ᵃ | 6.0, [0.9 – 16.0] | 5.8, [1.18 – 22.8] | 1.8, [0.95 – 11.5] |
| Bleeding and Anemia | 3.0, [2.0 – 4.0]ᵃ | 5.5, [3.0 – 7.8] | 1.7, [0.8 – 3.2] | 0.7, [0.52 – 1.4] |
| Renal Failure | 3.0, [2.0 – 11.0]ᵃ | 3.0, [2.0 – 7.0] | 1.5, [1.05 – 3.9]ᵃ | 1.55, [1.1 – 4.4] |
| Hematology and Oncology | 2.0, [0.0 – 6.0]ᵃ | 0.0, [0.0 – 3.8] | 0.9, [0.7 – 2.2]ᵃ | 0.8, [0.8 – 1.4] |
| Unclassifiable admission reasons | 19.0, [13.0 – 20.0]ᵃ | 11.0, [6.0 – 14.0] | 5.7, [2.3 – 25.05]ᵃ | 4.05, [1.52 – 10.1] |

During the test, PRISM and PDR scores were evaluated separately for each group. It was hypothesized as an alternative hypothesis that these risk scores differ by having higher median values in patients who were transfused compared to those who were not transfused. This hypothesis was tested with an alpha of 0.05. Differences in many groups were found to be significant; groups where the difference was not significant are marked with an *“a”* next to their values.

# eTable 5 - Subgroup Analysis of Age and Malnutrition Categories Using Univariate Logistic Regression

| **Subgroup ORs for Repeated vs. Single Transfusion** | **Repeated Transfused,**  **n (%)** | **Single Transfused,**  **n (%)** | **OR [95 % CI]** |
| --- | --- | --- | --- |
| **Age group** |  |  |  |
| 0–2 years | 85 (33.2) | 171 (66.8) | 2.7 [2.0–3.6] |
| 2–6 yearsᵃ | 52 (32.7) | 107 (67.3) | 1.1 [0.8–1.6] |
| 6–12 years | 22 (29.7) | 52 (70.3) | 0.5 [0.3–0.9] |
| > 12 years | 26 (37.7) | 43 (62.3) | 0.4 [0.3–0.6] |
| **Malnutrition groups** |  |  |  |
| Severely underweight | 37 (37.0) | 63 (63.0) | 2.0 [1.4–3.0] |
| Underweight | 35 (41.7) | 49 (58.3) | 2.2 [1.5–3.3] |
| Normal | 93 (31.1) | 206 (68.9) | 0.6 [0.4–0.8] |
| At risk of overweightᵃ | 13 (17.5) | 24 (64.9) | 0.6 [0.3–1.1] |
| Overweightᵃ | 18 (35.1) | 5 (64.9) | 0.7 [0.3–1.8] |
| Obeseᵃ | 4 (26.7) | 11 (73.3) | 1.9 [0.6–5.5] |
| **Admitting type** |  |  |  |
| Pediatric emergency room | 98 (34.4) | 67 (54.0) | 0.7 [0.5–0.9] |
| Surgical departments | 32 (21.2) | 119 (78.8) | 0.6 [0.4–0.9] |
| Pediatric departments | 57 (46.0) | 67 (54.0) | 2.8 [2.0–3.9] |
| **Admitting categories** |  |  |  |
| Postoperative monitoringᵃ | 28 (17.4) | 133 (82.6) | 0.5 [0.3–0.7] |
| Respiratory failure | 67 (46.2) | 78 (53.8) | 3.3 [2.4–4.6] |
| Intoxication | 1 (100.0) | 0 (0.0) | 0.0 [0.0–0.2] |
| Trauma | 34 (38.2) | 55 (61.8) | 2.0 [1.4–3.1] |
| Circulatory insufficiencyᵃ | 13 (34.2) | 25 (65.8) | 0.6 [0.4–1.1] |
| CNS dysfunctionᵃ | 10 (30.3) | 23 (69.7) | 0.7 [0.4–1.4] |
| Septic shock | 11 (34.4) | 21 (65.6) | 2.3 [1.2–4.4] |
| Bleeding and anemia | 7 (39.0) | 11 (61.0) | 3.1 [1.3–7.2] |
| Renal failureᵃ | 3 (20.0) | 12 (80.0) | 1.3 [0.4–4.3] |
| Hematology and oncologyᵃ | 5 (41.7) | 7 (58.3) | 2.9 [1.1–8.0] |
| Unclassifiable admission reasons | 8 (50.0) | 8 (50.0) | 0.4 [0.2–0.7] |

The results of subgroups marked with *“a”* were not found to be statistically significant (p > 0.05).

# eTable 6 - Comparative analysis of patient characteristics based on frequency of RBC transfusions in the pediatric intensive care unit

| **Patient Characteristics by Number of RBC Transfusions in the PICU** | **Single transfused** | **Dual transfused** | **Multiple transfused** |
| --- | --- | --- | --- |
| **Number of patients, n (%)** | 365 (65.4) | 108 (19.3) | 85 (15.2) |
| **First administration Hb (g/dL), median [IQR]** | 9.0 [8.2–9.6] | 8.8 [8.1–9.5] | 8.6 [7.8–9.6] |
| **Whole administration Hb (g/dL), median [IQR]** | 8.9 [8.1–9.6] | 9.1 [8.4–9.7] | 9.2 [8.6–9.8] |
| **Age (months), median [IQR]** | 21.0 [9.0–70.0] | 18.0 [5.0–73.0] | 12.0 [4.0–50.0] |
| **Weight-for-age z-score, median [IQR]** | −0.7 [−2.4–0.2] | −0.8 [−2.3–0.4] | −1.6 [−3.1–−0.2] |
| **PDR (%), median [IQR]** | 2.4 [0.8–10.8] | 5.7 [1.3–22.5] | 10.1 [2.8–29.7] |
| **LOS in PICU (days), median [IQR]** | 4.0 [2.0–8.0] | 8.0 [5.0–17.0] | 9.0 [13.0–44.0] |

This table presents a detailed breakdown of the characteristics for patients who received single, dual, and multiple RBC transfusions in a PICU. It includes the number of patients in each category, their median hemoglobin (Hb) levels at first and during all administrations, median age, WFA z-scores, PDR percentages, median time to transfusion, and LOS in PICU. The values are presented as medians with IQR. The analysis of relationships between these groups, specifically comparing the single, dual, and multiple transfusion groups in sequence, was conducted using the Mann-Whitney U test, and alternative hypotheses (less and greater) were tested. All differences found, including those in age, time to transfusion for the group, PICU LOS, first administered RBC transfusion pre-Hb level, group's pre-transfusion Hb level, WFA-Z score, and PDR percentage, were statistically significant (p<0.001).

###

# eFigure 1 - Comparison of Hb levels distributions according to transfusion status during admission


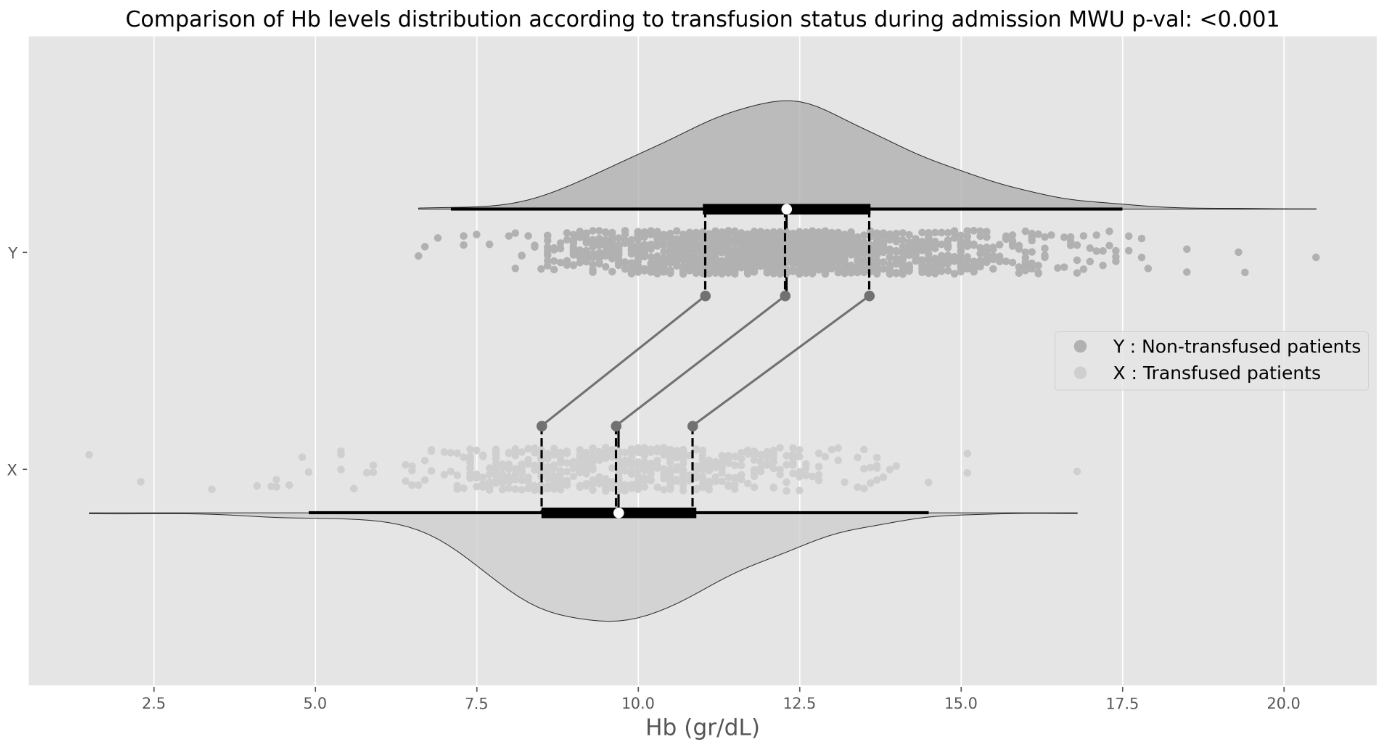


Shift plot of hemoglobin (Hb) levels comparing transfused and non-transfused patients upon admission. Transfused patients (X) had a median pre-transfusion Hb level of 8.9 g/dL (IQR: 8.1-9.6 g/dL), notably lower than the median pre-discharge Hb of 11.9 g/dL (IQR: 10.5-13.1 g/dL) for non-transfused patients (Y), with a p-value < 0.001 indicating significant difference.
